# Supplementary material for: Two potential natural calcite reference materials for laser in situ Sr isotope analysis
Source: Royal Society of Chemistry journal article supplement (doi:10.1039/d5ja00103j), 2025-01-01
Supplement: d5ja00103j2.xlsx [file d5ja00103j2.xlsx]

## Sheet: Table S1 Parameters
Table S1 Operational parameters for ICP-MS instruments and laser ablation systems in in situ trace element and Sr isotope analysis
Trace element
Laser ablation system
Make, Model & type	New Wave 193UC
Ablation cell	Two-Volume Ⅱ
Laser wavelength	193 nm
Pulse width	5 ns
Energy density	2.7 J·cm-2
Repetition rate	8 Hz
Spot size	150 μm
Sampling mode / pattern	Single spot analysis
Cell carrier gas flow (He)	0.3 L·min-1
Emhancement gas flow (N2)	3 ~ 6 mL·min-1
Background time	20 s
Ablation duration	40 s
Washout time	10 s
Q-ICP-MS Instrument
Make, Model & type	Agilent 7900 quadrupole ICPMS
Radio frequency power (W)	1350 W
Coolant gas flow (Ar)	15.00 L·min-1
Carrier gas flow (Ar)	0.90 ~ 1.05 L·min-1
Isotopes measured	24Mg, 51V, 53Cr, 55Mn, 57Fe, 71Ga, 85Rb, 88Sr, 89Y, 90Zr, 137Ba, 139La, 140Ce, 141Pr, 143Nd, 147Sm, 151Eu, 157Gd, 159Tb, 163Dy, 165Ho, 166Er, 169Tm, 173Yb, 175Lu, 208Pb, 232Th, 238U
Sr isotope
Laser ablation system
Make, model, and type	ASI RESOlution S155 LR 193 nm ArF excimer
Ablation cell	Laurin Technic, S-155
Laser wavelength	193 nm
Pulse duration	20 ns
Energy density	5 J·cm-2
Repetition rate	6 Hz
Spot size	23 μm, 33 μm, 75 μm, 110 μm, 130 μm, 160μm
Sampling mode	Single spot analysis
Carrier gas flow (He)	0.3 L·min-1
Enhancement gas flow (N2)	3–5 mL·min-1
Background time	20 s
Ablation duration	40 s
Washout time	10 s
MC-ICP-MS instrument
Make, model, and type	Thermo Fisher, Neptune Plus
Radio frequency power	1300 W
Guard electrode	Connected (Pt)
Cone combinations	Jet + X (Nickel)
Fore vacuum P (mbar)	7.65 × 10-4
High vacuum P (mbar)	2.44 × 10-7
Plasma gas flow (Ar)	15.00 L·min-1
Auxiliary gas flow (Ar)	0.80 L·min-1
Make up gas flow (Ar)	0.9-1.1 L·min-1
Integration time	0.262 s
Detector configurations	L3(84Sr), L2(85Rb), C(86Sr), H2(87Sr), H3(88Sr)

## Sheet: Table S2 EPMA
Table S2 EPMA measurement results for major elements (wt%) in TARIM and HZZ-2 calcite grains
Grain ID	Comment	CaO	SrO	BaO	MgO	SiO2	FeO	MnO	TOTAL
HZZ-2	A-1	56.191	0	0	0.209	0	0	0	56.4
	A-2	56.343	0	0.013	0.232	0.024	0	0	56.612
	A-3	56.2	0	0.067	0.251	0	0.018	0.01	56.546
	A-4	56.104	0	0	0.243	0	0	0.01	56.357
	A-5	56.624	0	0	0.207	0	0	0	56.831
	B-1	56.821	0	0.038	0.209	0.01	0	0	57.078
	B-2	56.62	0.006	0.054	0.247	0	0	0	56.927
	B-3	57.044	0	0.05	0.159	0	0	0	57.253
	B-4	56.259	0	0	0.179	0	0	0	56.438
	B-5	56.675	0	0.075	0.21	0	0	0	56.96
	C-1	56.869	0	0.033	0.237	0.007	0.001	0	57.147
	C-2	56.082	0	0	0.249	0	0	0.023	56.354
	C-3	56.702	0	0	0.267	0.009	0	0	56.978
	C-4	56.607	0	0	0.199	0.002	0	0.004	56.812
	C-5	56.775	0	0.021	0.179	0.009	0.017	0.023	57.024
	D-1	56.831	0	0	0.221	0	0	0	57.052
	D-2	55.778	0	0	0.212	0.005	0.006	0.032	56.033
	D-3	56.607	0	0.029	0.213	0	0	0.036	56.885
	D-4	56.207	0	0	0.229	0.015	0	0	56.451
	D-5	56.014	0	0	0.219	0	0.019	0.004	56.256
	E-1	55.977	0	0.058	0.232	0	0	0	56.267
	E-2	55.728	0	0.054	0.203	0	0.004	0.03	56.019
	E-3	56.007	0	0.017	0.179	0	0	0	56.203
	E-4	56.893	0	0	0.194	0.012	0	0.008	57.107
	E-5	56.921	0	0.008	0.187	0.018	0.026	0	57.16
	F-1	55.743	0	0	0.201	0.02	0	0.013	55.977
	F-2	56.05	0	0	0.184	0	0.012	0.006	56.252
	F-3	56.701	0	0.062	0.184	0	0	0.034	56.981
	F-4	56.273	0	0	0.28	0.037	0.021	0.002	56.613
	F-5	56.401	0	0	0.27	0	0.004	0.025	56.7
	G-1	56.578	0	0.021	0.181	0.01	0	0	56.79
	G-2	56.19	0	0.004	0.206	0.012	0.009	0	56.421
	G-3	56.244	0	0	0.177	0	0	0.013	56.434
	G-4	56.693	0	0	0.18	0	0.011	0	56.884
	G-5	56.45	0	0.058	0.18	0	0.015	0	56.703
	H-1	55.462	0	0	0.207	0	0.047	0	55.716
	H-2	56.196	0	0	0.241	0.045	0	0	56.482
	H-3	57.055	0	0	0.193	0.008	0.003	0	57.259
	H-4	57.262	0	0.008	0.228	0	0.003	0.032	57.533
	H-5	56.557	0	0	0.203	0	0	0	56.76
TARIM	J-1	56.586	0	0.05	0.138	0	0.001	0	56.775
	J-2	56.276	0	0	0.139	0	0	0.042	56.457
	J-3	56.19	0	0	0.194	0	0.002	0	56.386
	J-4	56.383	0	0.146	0.13	0.015	0.015	0.009	56.698
	J-5	55.702	0	0.062	0.168	0	0.007	0.009	55.948
	K-1	56.751	0	0.054	0.157	0.013	0	0	56.975
	K-2	56.568	0	0	0.151	0	0	0.009	56.728
	K-3	56.5	0	0	0.116	0.003	0.006	0	56.625
	K-4	56.629	0	0	0.11	0	0.015	0.011	56.765
	K-5	56.713	0	0	0.137	0	0	0	56.85
	L-1	56.226	0	0	0.15	0.016	0.048	0.017	56.457
	L-2	57.06	0	0	0.146	0	0	0.008	57.214
	L-3	56.37	0	0.054	0.175	0	0.018	0.032	56.649
	L-4	56.136	0	0	0.16	0.004	0	0.028	56.328
	L-5	56.438	0	0	0.155	0	0	0.042	56.635
	M-1	56.288	0	0	0.19	0.01	0	0	56.488
	M-2	56.396	0	0	0.194	0.015	0.017	0	56.622
	M-3	56.675	0	0	0.127	0.01	0	0.061	56.873
	M-4	56.662	0	0.025	0.135	0.004	0	0.009	56.835
	M-5	56.829	0	0	0.155	0	0	0.025	57.009

## Sheet: Table S3  trace elements
Table S3 Trace element composition of HZZ-2 and TARIM calcite determined by LA-ICP-MS (μg·g-1).
Name	24Mg	51V	53Cr	55Mn	57Fe	71Ga	85Rb	88Sr	89Y	90Zr	137Ba	139La	140Ce	141Pr	143Nd	147Sm	151Eu	157Gd	159Tb	163Dy	165Ho	166Er	169Tm	173Yb	175Lu	208Pb	232Th	238U
HZZ-2 @150 μm, 2.7 J·cm-2, 8 Hz
HZZ-2-A-01	1150	0.128	0.137	29.4	556	0.00673	0.01	1100	0.709	-	0.2648	0.764	0.987	0.112	0.49	0.0836	0.0272	0.0981	0.0135	0.0701	0.0121	0.0344	0.00188	0.00806	0.00209	0.005	-	0.001
HZZ-2-A-02	1150	0.079	0.102	30.4	557	0.00455	0.009	1080	0.392	-	0.34	0.171	0.267	0.0363	0.216	0.0374	0.0149	0.0433	0.00479	0.0396	0.00523	0.0157	0.00135	0.00434	0.00112	0.006	-	0.001
HZZ-2-A-03	1190	0.047	0.048	25.6	568	-	0.004	1120	0.203	-	0.388	0.0851	0.136	0.0157	0.0663	0.0112	0.00897	0.013	0.00193	0.016	0.00376	0.00965	0.000513	-	-	0.003	-	-
HZZ-2-A-04	1090	0.067	0.182	29.6	555	-	0.003	1190	0.331	-	0.56	0.118	0.196	0.0257	0.125	0.0412	0.0188	0.0386	0.00604	0.0258	0.00593	0.0141	0.00125	0.00347	-	0.004	-	0.001
HZZ-2-A-05	1130	0.078	0.138	28.9	558	0.00484	0.001	1110	0.33	-	0.39	0.218	0.292	0.029	0.156	0.0285	0.0204	0.0507	0.00746	0.0327	0.00451	0.0123	0.000826	0.00577	-	0.004	-	-
HZZ-2-B-01	900	0.224	0.104	25.6	555	0.00649	0.002	1170	0.9	-	0.199	1.63	1.96	0.189	0.772	0.126	0.0592	0.148	0.0187	0.123	0.0156	0.0352	0.00342	0.0148	0.00206	0.002	-	0.001
HZZ-2-B-02	904	0.187	0.138	25.5	553	0.0176	0.002	1120	0.848	-	0.211	1.26	1.54	0.155	0.663	0.13	0.0511	0.132	0.0138	0.0914	0.0182	0.0411	0.00337	0.00921	0.00117	0.002	-	0.001
HZZ-2-B-03	886	0.215	0.149	25.5	561	0.00677	0.001	1170	0.735	-	0.216	1.3	1.59	0.154	0.61	0.0954	0.0556	0.128	0.0135	0.073	0.0158	0.0353	0.00275	0.0131	0.00129	0.001	-	0.005
HZZ-2-B-04	889	0.242	0.112	25.8	544	0.00534	0.008	1120	0.724	-	0.198	1.31	1.58	0.151	0.666	0.114	0.0557	0.121	0.0156	0.0718	0.0159	0.0336	0.00227	0.0151	0.000651	0.001	-	-
HZZ-2-B-05	893	0.213	0.0893	24.9	548	0.0105	0.003	1260	0.873	-	0.225	1.34	1.63	0.167	0.654	0.113	0.0581	0.143	0.0153	0.0865	0.0151	0.0407	0.00292	0.0167	0.000745	0.001	-	0.001
HZZ-2-C-01	1370	0.0596	0.0924	34.1	553	0.00913	0.009	501	0.146	0.0041	0.00139	0.125	0.189	0.0209	0.105	0.0203	0.0156	0.0281	0.00273	0.0123	0.00145	0.00428	0.000641	0.0067	-	-	-	-
HZZ-2-C-02	1370	0.0405	0.152	29	548	0.00348	0.001	626	0.151	-	0.0492	0.134	0.19	0.0174	0.0993	0.0117	0.0139	0.0284	0.00269	0.0133	0.00215	0.00401	-	0.00354	-	-	-	-
HZZ-2-C-03	1380	0.0498	0.0433	32.2	552	0.00271	0.001	533	0.125	-	0.0471	0.133	0.187	0.0221	0.0592	0.0101	0.0115	0.0248	0.00233	0.012	0.00119	0.00261	-	0.00344	-	-	-	-
HZZ-2-C-04	921	0.277	0.175	26.8	543	0.00164	0.007	1010	0.535	-	0.159	0.781	0.925	0.0973	0.384	0.0566	0.0463	0.0829	0.00904	0.061	0.00832	0.0213	0.00096	0.00388	-	-	-	-
HZZ-2-C-05	919	0.19	0.0561	26.3	534	0.00334	-	1060	0.476	-	0.176	0.659	0.792	0.0781	0.364	0.0579	0.0411	0.0785	0.00765	0.041	0.00839	0.0169	0.0017	0.00474	0.001	-	-	-
HZZ-2-D-01	1050	0.101	0.176	28.6	540	0.007	0.003	1300	0.346	-	0.901	0.449	0.715	0.0767	0.316	0.0663	0.0293	0.0657	0.00637	0.0304	0.00777	0.0151	0.0015	0.00997	0.001	-	-	0.001
HZZ-2-D-02	1090	0.11	0.119	29.8	556	0.00161	0.003	1280	0.465	-	0.52	0.937	1.17	0.105	0.437	0.0828	0.0428	0.0853	0.00913	0.0566	0.00821	0.0384	0.000962	0.00926	0.001	-	-	0.001
HZZ-2-D-03	1040	0.125	0.0907	28.5	543	0.0107	0.006	1250	0.3	0.0123	0.832	0.426	0.67	0.0643	0.237	0.0457	0.0282	0.0541	0.00632	0.0282	0.00494	0.0102	0.00188	0.00612	-	-	-	0.002
HZZ-2-D-04	985	0.096	0.152	43.2	558	0.00765	-	278	0.377	0.00326	0.691	0.292	0.402	0.0434	0.247	0.0386	0.0204	0.0414	0.00533	0.0363	0.00616	0.0236	0.00201	0.00813	0.001	-	-	0.025
HZZ-2-D-05	1280	0.03	0.115	32.9	536	0.00194	0.008	462	0.0937	-	-	0.148	0.217	0.0235	0.1	0.0174	0.0128	0.0201	0.00207	0.00995	0.00275	0.00436	-	-	-	-	-	0.002
HZZ-2-E-01	1120	0.182	0.107	29.7	546	0.00709	0.016	1210	0.635	0.00115	0.367	0.984	1.13	0.125	0.527	0.0891	0.0465	0.12	0.0109	0.0699	0.0135	0.0261	0.00332	0.0125	0.00109	-	-	-
HZZ-2-E-02	1130	0.17	0.0441	29.9	549	0.0104	-	1180	0.526	0.000776	0.385	0.645	0.742	0.081	0.352	0.0656	0.0374	0.0919	0.00784	0.0558	0.0086	0.0242	0.00275	0.00867	0.00136	-	-	0.003
HZZ-2-E-03	1120	0.176	0.134	30.1	542	0.00885	0.001	1210	0.696	-	0.286	1	1.23	0.129	0.48	0.0872	0.0498	0.113	0.0123	0.0795	0.0147	0.0225	0.00471	0.011	0.00153	-	-	0.001
HZZ-2-E-04	1140	0.136	0.124	29.9	550	0.000766	0.006	1120	0.599	-	0.255	0.754	0.915	0.0947	0.453	0.0773	0.0368	0.0865	0.0136	0.0642	0.0104	0.0308	0.00209	0.0135	0.000765	-	-	-
HZZ-2-E-05	1130	0.178	0.0941	29.6	548	0.000724	0.005	1220	0.499	-	0.378	0.655	0.766	0.0803	0.39	0.0685	0.0323	0.0699	0.00731	0.049	0.0106	0.0184	0.00113	0.00785	0.00165	-	-	0.002
HZZ-2-F-01	1130	0.138	0.108	30.6	538	0.0052	0.004	1200	0.524	-	0.645	0.758	1.14	0.125	0.478	0.0968	0.0357	0.0768	0.0101	0.0685	0.0118	0.0241	0.00197	0.0102	0.00072	-	-	-
HZZ-2-F-02	1110	0.105	0.151	30.5	543	0.0079	0.005	1240	0.502	-	0.631	0.731	1.14	0.111	0.475	0.0998	0.0339	0.0909	0.0104	0.0607	0.00913	0.0252	0.00321	0.00956	0.00132	-	-	-
HZZ-2-F-03	1120	0.101	0.126	30.1	534	0.00348	0.005	1220	0.471	-	0.582	0.704	1.13	0.119	0.49	0.0935	0.0319	0.0734	0.011	0.0584	0.00845	0.0249	0.00223	0.00754	0.00135	-	-	0.001
HZZ-2-F-04	1040	0.104	0.0427	34.1	545	0.00501	0.008	984	0.514	0.00529	0.404	0.696	1.08	0.109	0.458	0.112	0.0308	0.103	0.00905	0.0617	0.00967	0.0248	0.00271	0.0112	0.00113	-	-	0.001
HZZ-2-F-05	1130	0.129	0.107	30.9	542	0.0037	0.007	1200	0.484	-	0.612	0.813	1.21	0.12	0.501	0.0771	0.0365	0.117	0.00896	0.0646	0.00965	0.0252	0.00201	0.00944	0.000834	-	-	0.001
HZZ-2-G-01	1060	0.129	0.0665	28.8	533	-	0.014	1320	0.405	-	0.875	0.522	0.833	0.0831	0.326	0.072	0.0326	0.0721	0.00573	0.0545	0.00632	0.0228	0.0016	0.00543	0.00181	-	-	-
HZZ-2-G-02	960	0.171	0.109	26	540	0.0242	0.009	1410	0.83	-	0.36	1.67	2.11	0.223	0.837	0.134	0.0747	0.155	0.0177	0.0972	0.0156	0.0346	0.0036	0.017	0.00348	-	-	0.00169
HZZ-2-G-03	1100	0.107	0.0573	29.5	545	0.00815	0.001	1370	0.449	-	0.563	0.863	1.07	0.11	0.434	0.097	0.0346	0.07	0.00948	0.0449	0.0104	0.0175	0.00131	0.00428	0.000637	-	-	0.000646
HZZ-2-G-04	1080	0.116	0.0684	29.7	549	0.00582	0.001	1350	0.503	-	0.611	0.942	1.2	0.115	0.519	0.103	0.0451	0.0986	0.01	0.0568	0.00974	0.0228	0.00183	0.00969	0.00133	-	-	0.00623
HZZ-2-G-05	891	0.181	0.0963	25.1	534	0.00605	0.006	1370	0.895	-	0.191	1.79	2.34	0.22	0.859	0.142	0.0597	0.191	0.0187	0.111	0.0199	0.0485	0.00481	0.0165	0.00358	-	-	0.000981
HZZ-2-H-01	1160	0.166	0.174	31.1	545	0.00335	0.004	1130	0.506	-	0.283	0.641	0.807	0.0866	0.343	0.0738	0.0401	0.0685	0.00748	0.0441	0.0113	0.0206	0.0025	0.0078	0.000666	-	-	0.002
HZZ-2-H-02	1150	0.167	0.109	30.6	535	0.00776	0.005	1160	0.578	-	0.28	0.718	0.869	0.0865	0.404	0.0774	0.0445	0.0889	0.0104	0.047	0.00864	0.0332	0.0022	0.0103	0.00111	-	-	0.001
HZZ-2-H-03	1110	0.141	0.111	29.6	537	-	0.008	1160	0.65	0.00863	0.215	0.5	0.637	0.0768	0.333	0.0665	0.0412	0.0822	0.0113	0.0545	0.0111	0.0292	0.00222	0.0121	0.00138	-	-	0.001
HZZ-2-H-04	1150	0.156	0.111	30.9	544	-	0.001	1140	0.604	-	0.154	0.422	0.554	0.0551	0.259	0.0603	0.0351	0.0885	0.01	0.06	0.0116	0.0261	0.0018	0.00883	0.00107	-	-	0.001
HZZ-2-H-05	1190	0.126	0.156	31.6	544	-	0.009	1100	0.397	-	0.26	0.456	0.558	0.0626	0.216	0.043	0.0296	0.0786	0.00564	0.0322	0.0076	0.0191	0.00149	0.00434	0.000539	-	-	0.001
TARIM @150 μm, 2.7 J·cm-2, 8 Hz
TARIM-J-01	887	2.42	0.105	67.8	550	0.0059	0.014	600	6.78	0.0617	0.0927	0.0424	0.124	0.0313	0.286	0.245	0.0754	0.448	0.0639	0.464	0.107	0.317	0.0379	0.23	0.0269	-	0.003	0.271
TARIM-J-02	739	1.84	0.13	61.4	536	0.016	0.008	702	9.84	0.0505	0.14	0.0505	0.159	0.0426	0.353	0.324	0.108	0.629	0.092	0.673	0.157	0.447	0.0588	0.322	0.0446	-	0.002	0.389
TARIM-J-03	863	3.06	0.081	65.5	544	0.00124	0.008	624	7.81	0.0604	0.0896	0.0578	0.145	0.0413	0.37	0.286	0.0972	0.574	0.0784	0.532	0.129	0.378	0.043	0.28	0.0313	-	0.003	0.268
TARIM-J-04	899	3.2	0.074	66	544	0.018	0.003	610	6.9	0.0767	0.0923	0.046	0.13	0.0316	0.281	0.252	0.0817	0.495	0.0673	0.521	0.111	0.299	0.0371	0.214	0.0276	-	0.003	0.285
TARIM-J-05	934	2.74	0.135	67.7	529	-	0.002	519	6.55	0.0585	0.0954	0.0481	0.141	0.0416	0.354	0.238	0.0834	0.425	0.0637	0.471	0.104	0.304	0.0388	0.22	0.0259	-	0.003	0.342
TARIM-J-06	787	2.55	0.08	59.4	542	0.00259	0.002	669	9.68	0.0604	0.161	0.0566	0.173	0.05	0.394	0.338	0.106	0.636	0.0943	0.663	0.151	0.475	0.0535	0.342	0.0391	-	0.003	0.545
TARIM-J-07	809	2.47	0.148	61.1	556	0.00779	0.006	644	9.5	0.0681	0.14	0.0568	0.173	0.0452	0.404	0.325	0.101	0.607	0.0923	0.659	0.156	0.475	0.0533	0.312	0.0439	-	0.002	0.423
TARIM-J-08	924	2.99	0.215	64.3	545	0.0116	0.005	516	7.27	0.935	0.0741	0.0748	0.193	0.049	0.459	0.298	0.106	0.581	0.0699	0.54	0.116	0.351	0.0422	0.245	0.0333	-	0.003	0.428
TARIM-J-09	907	3.01	0.092	63.1	554	-	0.003	576	8.04	0.099	0.0378	0.0602	0.172	0.0403	0.395	0.323	0.1	0.578	0.0833	0.581	0.132	0.374	0.0496	0.274	0.0295	-	0.00194	0.264
TARIM-J-10	833	2.91	0.114	61.6	546	0.0027	0.008	620	7.98	0.079	0.196	0.06	0.168	0.0437	0.369	0.273	0.0922	0.509	0.0827	0.55	0.128	0.364	0.0446	0.271	0.0365	-	0.000873	0.208
TARIM-K-01	764	2.61	0.14	61.9	536	0.00498	0.017	679	9.43	0.0443	0.186	0.0592	0.167	0.042	0.371	0.334	0.106	0.642	0.0904	0.642	0.16	0.446	0.0563	0.306	0.0456	-	0.00156	0.316
TARIM-K-02	771	2.11	0.191	63.3	541	-	0.008	694	10.1	0.0376	0.194	0.0535	0.154	0.0397	0.354	0.344	0.106	0.634	0.0959	0.681	0.157	0.474	0.0605	0.341	0.0398	-	0.000246	0.355
TARIM-K-03	791	3.11	0.112	63	544	-	0.004	649	8.85	0.0552	0.121	0.0618	0.148	0.0513	0.358	0.332	0.104	0.61	0.0869	0.633	0.139	0.436	0.0529	0.278	0.037	-	0.00066	0.239
TARIM-K-04	782	2.49	0.184	62.9	541	0.00259	0.001	661	9.24	0.0361	0.174	0.0648	0.158	0.0399	0.389	0.292	0.107	0.608	0.0834	0.616	0.149	0.445	0.0537	0.301	0.0397	-	0.000888	0.278
TARIM-K-05	785	3.24	0.26	62.3	539	0.00175	0.003	616	8.34	0.0647	0.0916	0.051	0.153	0.0405	0.376	0.267	0.105	0.61	0.084	0.617	0.13	0.386	0.0482	0.273	0.0349	-	0.000361	0.238
TARIM-K-06	741	3.85	0.094	60.3	540	0.148	0.002	629	8.03	0.0536	0.0847	0.0538	0.162	0.0482	0.387	0.314	0.0981	0.6	0.0823	0.582	0.129	0.379	0.0428	0.229	0.033	-	0.00134	0.366
TARIM-K-07	717	2.18	0.118	64.3	546	0.0129	0.008	652	9.5	0.0249	0.112	0.0597	0.179	0.0432	0.407	0.336	0.114	0.638	0.101	0.691	0.154	0.465	0.0546	0.263	0.0382	-	0.00343	0.722
TARIM-K-08	717	1.81	0.194	64.9	546	0.00385	0.004	639	10.2	0.0177	0.0821	0.0712	0.195	0.053	0.462	0.399	0.143	0.692	0.108	0.757	0.173	0.493	0.063	0.321	0.0514	-	0.00969	0.684
TARIM-K-09	750	1.88	0.095	64.3	544	-	0.006	645	10.3	0.0211	0.17	0.063	0.185	0.0477	0.427	0.361	0.127	0.734	0.105	0.78	0.176	0.492	0.0585	0.347	0.0507	-	0.00429	0.698
TARIM-K-10	706	2.97	0.14	63.7	549	0.00268	0.006	620	8.36	0.0362	0.0769	0.0601	0.171	0.0468	0.393	0.341	0.114	0.626	0.0838	0.613	0.134	0.425	0.0471	0.268	0.0357	-	0.00225	0.48
TARIM-L-01	858	3.29	0.154	61.9	529	0.00388	0.018	597	7.6	0.0851	0.063	0.046	0.143	0.0417	0.369	0.284	0.094	0.566	0.0712	0.546	0.123	0.334	0.0451	0.243	0.0333	-	0.0018	0.242
TARIM-L-02	961	3.06	0.115	69.2	534	0.00539	0.012	494	6.15	0.0675	0.0512	0.0388	0.122	0.0363	0.322	0.217	0.0801	0.488	0.0558	0.409	0.0968	0.293	0.0331	0.194	0.0281	-	-	0.177
TARIM-L-03	886	2.85	0.077	61.3	539	0.00834	0.007	586	7.32	0.0859	0.109	0.0469	0.135	0.0421	0.328	0.271	0.0905	0.507	0.0644	0.516	0.113	0.334	0.0399	0.222	0.0282	-	-	0.101
TARIM-L-04	790	3.55	0.085	60.5	532	0.00784	0.001	747	10.3	0.0526	0.164	0.052	0.171	0.0458	0.42	0.361	0.116	0.733	0.101	0.711	0.162	0.456	0.0614	0.338	0.0436	-	0.000539	0.129
TARIM-L-05	787	3.68	0.098	60.7	549	-	0.009	757	10.3	0.0561	0.141	0.0583	0.174	0.0474	0.424	0.375	0.123	0.718	0.102	0.735	0.161	0.495	0.0599	0.337	0.0423	-	0.000931	0.143
TARIM-L-06	785	3.59	0.148	60.9	546	0.00572	0.007	740	10.2	0.0678	0.175	0.0584	0.172	0.0441	0.417	0.35	0.123	0.748	0.0948	0.727	0.16	0.48	0.0611	0.34	0.0396	-	-	0.129
TARIM-L-07	859	3.75	0.015	61.6	534	0.00618	0.005	611	8.71	0.0951	0.0493	0.0503	0.177	0.0487	0.369	0.35	0.114	0.649	0.0807	0.631	0.143	0.387	0.0502	0.305	0.0428	-	0.00113	0.152
TARIM-L-08	847	2.56	0.096	57.5	530	0.00203	0.003	624	7.44	0.1	0.0759	0.053	0.128	0.0381	0.347	0.248	0.0827	0.506	0.0693	0.495	0.12	0.313	0.0381	0.197	0.023	-	-	0.0433
TARIM-L-09	788	3.48	0.095	57.8	543	-	0.008	712	9.23	0.0883	0.112	0.0514	0.172	0.0514	0.401	0.366	0.1	0.645	0.0927	0.599	0.146	0.406	0.0525	0.276	0.0372	-	0.00108	0.148
TARIM-L-10	888	3.24	0.161	63.7	541	0.00581	0.01	571	7.65	0.111	0.0713	0.0538	0.147	0.0386	0.35	0.294	0.0906	0.547	0.0778	0.531	0.122	0.351	0.0386	0.245	0.0336	-	-	0.056
TARIM-M-01	845	2.23	0.14	69.5	550	0.00435	0.013	555	6.62	0.0834	0.0596	0.0414	0.121	0.0287	0.292	0.202	0.0756	0.449	0.0633	0.455	0.0971	0.296	0.038	0.188	0.0245	-	0.00522	0.484
TARIM-M-02	877	2.33	0.089	71.6	532	0.00346	0.004	538	7.01	0.0899	0.0582	0.0453	0.114	0.0352	0.269	0.225	0.0841	0.467	0.0675	0.453	0.105	0.321	0.0403	0.19	0.0274	-	0.0098	0.553
TARIM-M-03	874	2.52	0.079	71.4	532	-	0.001	501	6.38	0.0793	0.0729	0.0427	0.121	0.0345	0.273	0.217	0.077	0.466	0.0619	0.428	0.106	0.302	0.0352	0.218	0.0294	-	0.0169	0.678
TARIM-M-04	709	2.58	0.144	65.8	542	0.0155	0.001	609	7.26	0.0793	0.132	0.0473	0.114	0.0423	0.313	0.244	0.0847	0.504	0.0664	0.498	0.112	0.345	0.0394	0.227	0.0269	-	0.00865	0.35
TARIM-M-05	760	2.59	0.15	67	542	0.0196	0.005	622	8.36	0.0764	0.123	0.0517	0.148	0.0417	0.321	0.282	0.107	0.56	0.0815	0.531	0.139	0.37	0.0456	0.253	0.0335	-	0.0113	0.567
TARIM-M-06	819	2.6	0.053	68.2	540	0.00534	0.003	580	7.7	0.0731	0.0779	0.0426	0.137	0.0403	0.296	0.28	0.0956	0.506	0.0711	0.521	0.119	0.345	0.0463	0.209	0.0326	-	0.0195	0.62
TARIM-M-07	801	2.71	0.177	67.4	541	0.0104	0.005	602	7.88	0.0722	0.125	0.0568	0.14	0.0386	0.367	0.289	0.0909	0.561	0.0743	0.52	0.119	0.377	0.043	0.28	0.0327	-	0.0247	0.512
TARIM-M-08	1100	3.45	0.137	84.1	542	0.00233	0.009	415	5.74	0.0721	0.0259	0.0404	0.11	0.0315	0.292	0.234	0.0833	0.409	0.0549	0.426	0.0944	0.276	0.0342	0.197	0.0272	-	0.0472	0.617
TARIM-M-09	796	1.88	0.063	65.2	541	0.00229	0.009	691	9.87	0.0551	0.144	0.0525	0.148	0.0396	0.371	0.332	0.113	0.587	0.0882	0.625	0.161	0.458	0.0576	0.343	0.0454	-	0.0261	0.533
TARIM-M-10	790	2.41	0.092	64.1	544	0.0155	0.005	693	9.41	0.0625	0.105	0.0532	0.151	0.0433	0.352	0.28	0.102	0.604	0.085	0.633	0.144	0.418	0.0547	0.281	0.0427	-	0.0261	0.52
BCR-2G @150 μm, 2.7 J·cm-2, 8 Hz
BCR-2G 01	18600	432	16.2	1520	68500	22.5	49.5	344	32.3	172	688	24.4	51.2	6.53	28.1	6.41	1.89	6.38	1.01	6.02	1.22	3.61	0.483	3.31	0.462	10.8	5.84	1.74
BCR-2G 02	18200	432	15.4	1480	66600	21.5	46.1	336	31.2	167	668	23.5	49	6.23	26.7	6.42	1.86	6.38	0.919	5.86	1.17	3.37	0.47	3.28	0.459	9.94	5.47	1.62
BCR-2G 03	18200	421	14.7	1470	66300	20.6	45.6	330	30.2	165	649	22.8	48.7	6.2	25.8	6.07	1.79	6.2	0.925	5.8	1.16	3.27	0.473	3.05	0.445	9.52	5.46	1.6
BCR-2G 04	18400	427	15.6	1490	68000	21.2	46	336	31.4	170	684	23.9	49.7	6.26	27.3	6.34	1.88	6.43	0.941	5.85	1.2	3.42	0.487	3.21	0.475	9.64	5.57	1.62
BCR-2G 05	18400	430	14.6	1500	67000	21.5	46.4	339	31.8	170	675	23.8	50.2	6.33	27.5	6.45	1.84	6.57	0.93	5.9	1.2	3.42	0.484	3.25	0.453	9.64	5.52	1.64
BCR-2G 06	18200	429	14.8	1480	66100	21	46.2	335	30.8	170	655	23.3	49.2	6.14	27	6.22	1.85	6.4	0.927	5.87	1.16	3.35	0.463	3.15	0.449	9.73	5.47	1.62
BCR-2G 07	18300	426	14.6	1470	66500	21.8	45.7	333	31.1	170	662	23.5	49.4	6.31	27.3	6.46	1.81	6.22	0.923	5.96	1.22	3.37	0.487	3.1	0.461	9.76	5.5	1.64
BCR-2G 08	18300	426	14.4	1480	66500	20.9	45.8	331	31.6	170	662	23.3	49.3	6.1	27	6.37	1.81	6.48	0.913	5.77	1.21	3.3	0.48	3.08	0.471	9.35	5.57	1.57
BCR-2G 09	18700	431	15.4	1500	66800	21.1	46	341	31.8	173	673	23.7	50.4	6.27	27.6	6.41	1.85	6.61	0.961	5.93	1.2	3.46	0.47	3.148	0.474	9.57	5.53	1.63
BCR-2G 10	18500	428	15.3	1490	66400	20.7	45.8	334	31.4	172	667	23.6	49.5	6.16	27.3	6.26	1.8	6.35	0.924	5.95	1.2	3.49	0.477	3.218	0.44	9.85	5.52	1.59
BCR-2G 11	18500	427	14.9	1510	66800	21.3	45.7	340	32.2	175	679	23.8	50.2	6.23	27.5	6.38	1.9	6.63	0.963	6.06	1.24	3.47	0.486	3.26	0.471	9.82	5.66	1.65
"-" indicates that the elemental content is below the detection limit.

## Sheet: Table S4 Sr isotope data
Table S4 Sr isotope ratios of HZZ-2 and TARIM calcite and reference materials determined using LA-MC-ICP-MS.
HZZ-2			TARIM
Analysis No.	87Sr/86Sr	2s	Analysis No.	87Sr/86Sr	2s
HZZ-2-A @75 μm, 5 J·cm-2, 6 Hz			TARIM-J @130 μm, 5 J·cm-2, 6 Hz
HZZ-2-A-01	0.709357	7.9e-05	TARIM-J-01	0.710442	5.8e-05
HZZ-2-A-02	0.709351	8.8e-05	TARIM-J-02	0.710404	3.5e-05
HZZ-2-A-03	0.709372	7.8e-05	TARIM-J-03	0.710428	3.6e-05
HZZ-2-A-04	0.709404	7.3e-05	TARIM-J-04	0.710451	3.3e-05
HZZ-2-A-05	0.709442	7.7e-05	TARIM-J-05	0.710417	3.6e-05
HZZ-2-A-06	0.709386	8.5e-05	TARIM-J-06	0.71045	4.5e-05
HZZ-2-A-07	0.709408	7.2e-05	TARIM-J-07	0.710391	4.9e-05
HZZ-2-A-08	0.709366	7.9e-05	TARIM-J-08	0.710461	4.3e-05
HZZ-2-A-09	0.709372	8e-05	TARIM-J-09	0.710424	5e-05
HZZ-2-A-10	0.709347	8e-05	TARIM-J-10	0.710416	4e-05
HZZ-2-A-11	0.709443	8.1e-05	TARIM-J-11	0.710431	4.5e-05
HZZ-2-A-12	0.709468	7.4e-05	TARIM-J-12	0.7104	3.6e-05
HZZ-2-A-13	0.709399	7.4e-05	TARIM-J-13	0.710423	3.5e-05
HZZ-2-A-14	0.70936	7.1e-05	TARIM-J-14	0.710403	3.4e-05
HZZ-2-A-15	0.709413	7.3e-05	TARIM-J-15	0.71039	3.8e-05
HZZ-2-A-16	0.709406	7.4e-05	TARIM-J-16	0.710464	4.9e-05
HZZ-2-A-17	0.709431	6.8e-05	TARIM-J-17	0.710427	3.9e-05
HZZ-2-A-18	0.709364	7.1e-05	TARIM-J-18	0.71041	3.7e-05
HZZ-2-A-19	0.709397	7.7e-05	TARIM-J-19	0.710448	6e-05
HZZ-2-A-20	0.709398	9.1e-05	TARIM-J-20	0.710404	4.1e-05
HZZ-2-A-21	0.709381	9.4e-05	TARIM-J-21	0.710437	3.5e-05
HZZ-2-A-22	0.709351	9e-05	TARIM-J-22	0.7104	2.5e-05
HZZ-2-A-23	0.70938	8.1e-05	TARIM-J-23	0.710424	2.6e-05
HZZ-2-A-24	0.709431	8.1e-05	TARIM-J-24	0.710424	2.9e-05
HZZ-2-A-25	0.709357	7.5e-05	TARIM-J-25	0.710401	3.7e-05
HZZ-2-A-26	0.709403	8.6e-05	TARIM-J-26	0.71042	4.5e-05
HZZ-2-A-27	0.709335	7.9e-05	TARIM-J-27	0.71039	4.6e-05
HZZ-2-A-28	0.709375	7.6e-05	TARIM-J-28	0.710448	4.2e-05
HZZ-2-A-29	0.709387	8.1e-05	TARIM-J-29	0.710408	5.3e-05
HZZ-2-A-30	0.70939	9.3e-05	TARIM-J-30	0.710428	3.7e-05
HZZ-2-A-31	0.709407	8.3e-05	TARIM-J-31	0.710433	4.1e-05
HZZ-2-A-32	0.709423	6.6e-05	TARIM-J-32	0.71046	4.5e-05
HZZ-2-A-33	0.70939	8.4e-05	TARIM-J-33	0.710475	5e-05
HZZ-2-A-34	0.709381	8.6e-05	TARIM-J-34	0.710422	6e-05
HZZ-2-A-35	0.709411	8.4e-05	TARIM-J-35	0.710399	5.3e-05
HZZ-2-A-36	0.709429	9.4e-05	Mean	0.710424	4.55246e-05
HZZ-2-A-37	0.70935	0.0001
HZZ-2-A-38	0.709429	9.1e-05	TARIM-K @130 μm, 5 J·cm-2, 6 Hz
HZZ-2-A-39	0.709408	7.8e-05	TARIM-K-01	0.710475	4.2e-05
HZZ-2-A-40	0.709403	8e-05	TARIM-K-02	0.710417	4.3e-05
Mean	0.709393	6.13618e-05	TARIM-K-03	0.710417	3.7e-05
			TARIM-K-04	0.710448	4.4e-05
HZZ-2-B @75 μm, 5 J·cm-2, 6 Hz			TARIM-K-05	0.710425	4.4e-05
HZZ-2-B-01	0.709408	8e-05	TARIM-K-06	0.710495	4.8e-05
HZZ-2-B-02	0.709395	7.4e-05	TARIM-K-07	0.710488	3.8e-05
HZZ-2-B-03	0.709423	8.1e-05	TARIM-K-08	0.710402	4.2e-05
HZZ-2-B-04	0.709458	7.8e-05	TARIM-K-09	0.710404	4.1e-05
HZZ-2-B-05	0.709437	7.4e-05	TARIM-K-10	0.71039	4.1e-05
HZZ-2-B-06	0.709417	8.4e-05	TARIM-K-11	0.710429	4e-05
HZZ-2-B-07	0.709367	7.5e-05	TARIM-K-12	0.710417	4e-05
HZZ-2-B-08	0.709425	6.9e-05	TARIM-K-13	0.710401	3.9e-05
HZZ-2-B-09	0.709405	7.5e-05	TARIM-K-14	0.710403	4e-05
HZZ-2-B-10	0.709405	7.3e-05	TARIM-K-15	0.710375	4.3e-05
HZZ-2-B-11	0.709416	8.8e-05	TARIM-K-16	0.710519	4.6e-05
HZZ-2-B-12	0.709453	7.7e-05	TARIM-K-17	0.710419	4.4e-05
HZZ-2-B-13	0.709395	8.1e-05	TARIM-K-18	0.710396	5.2e-05
HZZ-2-B-14	0.709452	8.7e-05	TARIM-K-19	0.710362	4.3e-05
HZZ-2-B-15	0.7095	0.00013	TARIM-K-20	0.710386	4.2e-05
HZZ-2-B-16	0.70939	8.1e-05	TARIM-K-21	0.71042	4.6e-05
HZZ-2-B-17	0.709415	8.5e-05	TARIM-K-22	0.710446	4.1e-05
HZZ-2-B-18	0.70944	8.1e-05	TARIM-K-23	0.710398	4.8e-05
HZZ-2-B-19	0.709453	8.5e-05	TARIM-K-24	0.710402	4.3e-05
HZZ-2-B-20	0.709417	7.3e-05	TARIM-K-25	0.710397	4.4e-05
HZZ-2-B-21	0.709362	6.6e-05	TARIM-K-26	0.710431	5e-05
HZZ-2-B-22	0.709411	8.4e-05	TARIM-K-27	0.710383	4.3e-05
HZZ-2-B-23	0.709464	8.9e-05	TARIM-K-28	0.710393	4.4e-05
HZZ-2-B-24	0.709413	8.4e-05	TARIM-K-29	0.710389	4.3e-05
HZZ-2-B-25	0.709409	8.8e-05	TARIM-K-30	0.710342	4.5e-05
HZZ-2-B-26	0.709413	8.8e-05	TARIM-K-31	0.7104	4.3e-05
HZZ-2-B-27	0.709418	8.2e-05	TARIM-K-32	0.710311	4.2e-05
HZZ-2-B-28	0.709367	9.1e-05	TARIM-K-33	0.710383	4.1e-05
HZZ-2-B-29	0.70944	0.00013	TARIM-K-34	0.710389	4.5e-05
HZZ-2-B-30	0.709356	9.4e-05	TARIM-K-35	0.710356	4.4e-05
HZZ-2-B-31	0.709417	8.8e-05	Mean	0.710409	8.3199e-05
HZZ-2-B-32	0.709455	9.9e-05
HZZ-2-B-33	0.70938	0.00011	TARIM-L @130 μm, 5 J·cm-2, 6 Hz
HZZ-2-B-34	0.709429	9e-05	TARIM-L-01	0.710461	6.6e-05
HZZ-2-B-35	0.70941	0.00011	TARIM-L-02	0.710492	5.2e-05
HZZ-2-B-36	0.709419	8.5e-05	TARIM-L-03	0.710467	4.3e-05
HZZ-2-B-37	0.709432	8.9e-05	TARIM-L-04	0.710485	4.1e-05
HZZ-2-B-38	0.70941	9e-05	TARIM-L-05	0.710475	4.4e-05
Mean	0.709418	6.00579e-05	TARIM-L-06	0.710468	4.3e-05
			TARIM-L-07	0.710488	4.6e-05
HZZ-2-C @75 μm, 5 J·cm-2, 6 Hz			TARIM-L-08	0.710465	4.6e-05
HZZ-2-C-01	0.709429	7.5e-05	TARIM-L-09	0.710485	4.4e-05
HZZ-2-C-02	0.70944	9.5e-05	TARIM-L-10	0.710495	4.7e-05
HZZ-2-C-03	0.70937	0.00011	TARIM-L-11	0.710476	5.4e-05
HZZ-2-C-04	0.709401	9e-05	TARIM-L-12	0.710447	4.3e-05
HZZ-2-C-05	0.709424	7.9e-05	TARIM-L-13	0.710478	4.6e-05
HZZ-2-C-06	0.709377	8.2e-05	TARIM-L-14	0.710466	4.1e-05
HZZ-2-C-07	0.709437	7.5e-05	TARIM-L-15	0.71052	5e-05
HZZ-2-C-08	0.709354	6.7e-05	TARIM-L-16	0.710449	5.1e-05
HZZ-2-C-09	0.70939	8.5e-05	TARIM-L-17	0.710436	5.7e-05
HZZ-2-C-10	0.709426	8e-05	TARIM-L-18	0.710454	5e-05
HZZ-2-C-11	0.70941	7.4e-05	TARIM-L-19	0.710459	5e-05
HZZ-2-C-12	0.709404	9.3e-05	TARIM-L-20	0.710437	4.7e-05
HZZ-2-C-13	0.709349	7.9e-05	TARIM-L-21	0.710483	5.8e-05
HZZ-2-C-14	0.70945	0.00011	TARIM-L-22	0.710505	4.5e-05
HZZ-2-C-15	0.70948	0.00011	TARIM-L-23	0.710474	4.9e-05
HZZ-2-C-16	0.70948	0.00011	TARIM-L-24	0.710434	5.2e-05
HZZ-2-C-17	0.70941	0.00011	TARIM-L-25	0.710427	5.1e-05
HZZ-2-C-18	0.70946	0.0001	TARIM-L-26	0.710498	4.2e-05
HZZ-2-C-19	0.70937	0.0001	TARIM-L-27	0.710405	5.7e-05
HZZ-2-C-20	0.70937	0.0001	TARIM-L-28	0.710422	4.8e-05
HZZ-2-C-21	0.709395	9e-05	TARIM-L-29	0.710461	5.2e-05
HZZ-2-C-22	0.7094	0.0001	TARIM-L-30	0.710555	8.1e-05
HZZ-2-C-23	0.70945	0.0001	TARIM-L-31	0.710472	6e-05
HZZ-2-C-24	0.70939	0.0001	TARIM-L-32	0.710492	6.1e-05
HZZ-2-C-25	0.7094	9.1e-05	TARIM-L-33	0.710477	4.8e-05
HZZ-2-C-26	0.709419	9.6e-05	TARIM-L-34	0.710495	4.8e-05
HZZ-2-C-27	0.70941	8.7e-05	TARIM-L-35	0.710461	3.6e-05
HZZ-2-C-28	0.709385	8.1e-05	TARIM-L-36	0.710477	3.8e-05
HZZ-2-C-29	0.709434	9.6e-05	TARIM-L-37	0.710461	4.8e-05
HZZ-2-C-30	0.709412	9e-05	TARIM-L-38	0.710456	4.7e-05
HZZ-2-C-31	0.709439	8.5e-05	TARIM-L-39	0.710469	3.5e-05
HZZ-2-C-32	0.709441	8.2e-05	TARIM-L-40	0.710466	4.8e-05
HZZ-2-C-33	0.70938	0.0001	Mean	0.71047	5.45318e-05
HZZ-2-C-34	0.70935	0.00013
HZZ-2-C-35	0.70934	0.00011	TARIM-M @130 μm, 5 J·cm-2, 6 Hz
HZZ-2-C-36	0.7094	0.00011	TARIM-M-01	0.71047	5.6e-05
HZZ-2-C-37	0.709405	9.9e-05	TARIM-M-02	0.710434	5.9e-05
HZZ-2-C-38	0.70945	0.00012	TARIM-M-03	0.71045	0.0001
HZZ-2-C-39	0.70948	0.00012	TARIM-M-04	0.710383	4.5e-05
HZZ-2-C-40	0.70938	0.00011	TARIM-M-05	0.7104	4.6e-05
Mean	0.70941	7.30584e-05	TARIM-M-06	0.710406	5.7e-05
			TARIM-M-07	0.710426	5.4e-05
HZZ-2-D @75 μm, 5 J·cm-2, 6 Hz			TARIM-M-08	0.710406	4.5e-05
HZZ-2-D-01	0.709387	8.8e-05	TARIM-M-09	0.710456	4.5e-05
HZZ-2-D-02	0.709376	9.7e-05	TARIM-M-10	0.710397	4.7e-05
HZZ-2-D-03	0.709438	9.1e-05	TARIM-M-11	0.710448	7.6e-05
HZZ-2-D-04	0.709427	7.2e-05	TARIM-M-12	0.710366	5.7e-05
HZZ-2-D-05	0.709398	7.8e-05	TARIM-M-13	0.710408	5.5e-05
HZZ-2-D-06	0.709347	9.1e-05	TARIM-M-14	0.71041	4.7e-05
HZZ-2-D-07	0.709391	7.6e-05	TARIM-M-15	0.710401	5e-05
HZZ-2-D-08	0.709411	8.4e-05	TARIM-M-16	0.710415	5.7e-05
HZZ-2-D-09	0.709407	8.2e-05	TARIM-M-17	0.710346	5.5e-05
HZZ-2-D-10	0.7094	8.6e-05	TARIM-M-18	0.710398	4.8e-05
HZZ-2-D-11	0.709414	8.5e-05	TARIM-M-19	0.710379	4.4e-05
HZZ-2-D-12	0.7094	8.6e-05	TARIM-M-20	0.710397	4.3e-05
HZZ-2-D-13	0.709449	8.7e-05	TARIM-M-21	0.710331	5.9e-05
HZZ-2-D-14	0.709457	8.6e-05	TARIM-M-22	0.710393	6.1e-05
HZZ-2-D-15	0.709445	8.6e-05	TARIM-M-23	0.710394	5.8e-05
HZZ-2-D-16	0.709454	8.5e-05	TARIM-M-24	0.710334	5.7e-05
HZZ-2-D-17	0.70941	0.0001	TARIM-M-25	0.710403	6e-05
HZZ-2-D-18	0.709388	8.9e-05	TARIM-M-26	0.710376	5e-05
HZZ-2-D-19	0.709383	9.5e-05	TARIM-M-27	0.710337	4.3e-05
HZZ-2-D-20	0.70946	9.7e-05	TARIM-M-28	0.710422	9.7e-05
HZZ-2-D-21	0.709341	8.1e-05	TARIM-M-29	0.710441	5.3e-05
HZZ-2-D-22	0.709379	8.2e-05	TARIM-M-30	0.710414	5.3e-05
HZZ-2-D-23	0.709374	8.9e-05	TARIM-M-31	0.710425	6.2e-05
HZZ-2-D-24	0.709415	9.4e-05	TARIM-M-32	0.710377	5e-05
HZZ-2-D-25	0.709407	8.2e-05	TARIM-M-33	0.710332	4.8e-05
HZZ-2-D-26	0.709418	8.9e-05	TARIM-M-34	0.710384	8.1e-05
HZZ-2-D-27	0.709338	8e-05	TARIM-M-35	0.710358	6e-05
HZZ-2-D-28	0.70943	0.00011	TARIM-M-36	0.71034	0.0001
HZZ-2-D-29	0.709401	8.9e-05	TARIM-M-37	0.710306	6.5e-05
HZZ-2-D-30	0.709356	8.3e-05	TARIM-M-38	0.710328	6.4e-05
HZZ-2-D-31	0.70935	0.00011	TARIM-M-39	0.710357	7.7e-05
HZZ-2-D-32	0.709374	8.7e-05	TARIM-M-40	0.710351	5.6e-05
HZZ-2-D-33	0.70945	0.00011	Mean	0.71039	7.95648e-05
HZZ-2-D-34	0.70939	0.0001
HZZ-2-D-35	0.709404	9.4e-05	TARIM-J2 @130 μm, 5 J·cm-2, 6 Hz
HZZ-2-D-36	0.70936	8.7e-05	TARIM-J2-01	0.710409	5.2e-05
HZZ-2-D-37	0.709434	8.4e-05	TARIM-J2-02	0.710389	3e-05
HZZ-2-D-38	0.709428	9e-05	TARIM-J2-03	0.710401	3.4e-05
HZZ-2-D-39	0.709375	8.4e-05	TARIM-J2-04	0.710412	3.7e-05
HZZ-2-D-40	0.709389	8e-05	TARIM-J2-05	0.710411	4.5e-05
Mean	0.709401	6.62407e-05	TARIM-J2-06	0.710474	4.5e-05
			TARIM-J2-07	0.710446	4.1e-05
HZZ-2-E @75 μm, 5 J·cm-2, 6 Hz			TARIM-J2-08	0.710443	5e-05
HZZ-2-E-01	0.709342	7.5e-05	TARIM-J2-09	0.710449	4.9e-05
HZZ-2-E-02	0.709397	8e-05	TARIM-J2-10	0.710382	4.8e-05
HZZ-2-E-03	0.709378	8.3e-05	TARIM-J2-11	0.710455	6.6e-05
HZZ-2-E-04	0.709376	7.1e-05	TARIM-J2-12	0.710397	2.3e-05
HZZ-2-E-05	0.709437	8.6e-05	TARIM-J2-13	0.710417	3.7e-05
HZZ-2-E-06	0.70941	8.3e-05	TARIM-J2-14	0.710429	4.5e-05
HZZ-2-E-07	0.709325	8.8e-05	TARIM-J2-15	0.710451	3.9e-05
HZZ-2-E-08	0.709347	7e-05	TARIM-J2-16	0.710422	4e-05
HZZ-2-E-09	0.70935	8.3e-05	TARIM-J2-17	0.710456	4.4e-05
HZZ-2-E-10	0.709373	8.6e-05	TARIM-J2-18	0.710326	5.3e-05
HZZ-2-E-11	0.70939	8.3e-05	TARIM-J2-19	0.710443	4.8e-05
HZZ-2-E-12	0.709385	7.8e-05	TARIM-J2-20	0.710409	4.1e-05
HZZ-2-E-13	0.709374	9.1e-05	TARIM-J2-21	0.71045	4.9e-05
HZZ-2-E-14	0.709402	8.6e-05	TARIM-J2-22	0.710384	4.3e-05
HZZ-2-E-15	0.709379	8.4e-05	TARIM-J2-23	0.710389	4e-05
HZZ-2-E-16	0.709408	8.2e-05	TARIM-J2-24	0.710428	4.3e-05
HZZ-2-E-17	0.709397	9.9e-05	TARIM-J2-25	0.7104	3.6e-05
HZZ-2-E-18	0.709354	8.7e-05	TARIM-J2-26	0.710402	4.5e-05
HZZ-2-E-19	0.70937	8.4e-05	TARIM-J2-27	0.710402	2.9e-05
HZZ-2-E-20	0.709383	8.1e-05	TARIM-J2-28	0.710396	3.4e-05
HZZ-2-E-21	0.709376	7.5e-05	TARIM-J2-29	0.71041	6.5e-05
HZZ-2-E-22	0.70942	8.7e-05	TARIM-J2-30	0.710457	4e-05
HZZ-2-E-23	0.709348	8.7e-05	TARIM-J2-31	0.710442	4.4e-05
HZZ-2-E-24	0.709371	9.8e-05	TARIM-J2-32	0.710427	5e-05
HZZ-2-E-25	0.70932	0.0001	TARIM-J2-33	0.710462	4.9e-05
HZZ-2-E-26	0.709402	7.8e-05	TARIM-J2-34	0.710395	4.9e-05
HZZ-2-E-27	0.709399	9.7e-05	TARIM-J2-35	0.710428	3.7e-05
HZZ-2-E-28	0.709387	8.6e-05	TARIM-J2-36	0.710379	3.9e-05
HZZ-2-E-29	0.70936	0.00011	TARIM-J2-37	0.710404	4.5e-05
HZZ-2-E-30	0.70939	9.8e-05	TARIM-J2-38	0.710424	4.6e-05
HZZ-2-E-31	0.709419	9.4e-05	TARIM-J2-39	0.710399	3.9e-05
HZZ-2-E-32	0.709334	9.8e-05	TARIM-J2-40	0.710437	3.6e-05
HZZ-2-E-33	0.709432	8.8e-05	Mean	0.710418	5.85864e-05
HZZ-2-E-34	0.709374	9.9e-05
HZZ-2-E-35	0.709415	9.8e-05	TARIM-K2 @130 μm, 5 J·cm-2, 6 Hz
HZZ-2-E-36	0.70937	0.00011	TARIM-K2-01	0.71048	5e-05
HZZ-2-E-37	0.70938	9.1e-05	TARIM-K2-02	0.7104	4e-05
HZZ-2-E-38	0.709353	8e-05	TARIM-K2-03	0.71041	4e-05
HZZ-2-E-39	0.709367	9.8e-05	TARIM-K2-04	0.71039	4e-05
HZZ-2-E-40	0.709397	8e-05	TARIM-K2-05	0.7104	4e-05
Mean	0.70938	5.55356e-05	TARIM-K2-06	0.7104	4e-05
			TARIM-K2-07	0.7104	4e-05
HZZ-2-F @75 μm, 5 J·cm-2, 6 Hz			TARIM-K2-08	0.71045	4e-05
HZZ-2-F-01	0.709393	5.2e-05	TARIM-K2-09	0.71041	4e-05
HZZ-2-F-02	0.709438	6e-05	TARIM-K2-10	0.71039	4e-05
HZZ-2-F-03	0.709397	5.8e-05	TARIM-K2-11	0.71041	5e-05
HZZ-2-F-04	0.709464	6.2e-05	TARIM-K2-12	0.71042	5e-05
HZZ-2-F-05	0.709402	5.7e-05	TARIM-K2-13	0.71041	4e-05
HZZ-2-F-06	0.709369	6e-05	TARIM-K2-14	0.71039	4e-05
HZZ-2-F-07	0.709367	5.5e-05	TARIM-K2-15	0.71041	4e-05
HZZ-2-F-08	0.709375	5.5e-05	TARIM-K2-16	0.7104	4e-05
HZZ-2-F-09	0.709423	5e-05	TARIM-K2-17	0.71044	4e-05
HZZ-2-F-10	0.70936	5.7e-05	TARIM-K2-18	0.71037	4e-05
HZZ-2-F-11	0.709406	6.1e-05	TARIM-K2-19	0.71041	4e-05
HZZ-2-F-12	0.709394	5.4e-05	TARIM-K2-20	0.71037	4e-05
HZZ-2-F-13	0.709329	5.9e-05	TARIM-K2-21	0.7104	5e-05
HZZ-2-F-14	0.709382	6e-05	TARIM-K2-22	0.71041	4e-05
HZZ-2-F-15	0.709376	5.7e-05	TARIM-K2-23	0.71044	4e-05
HZZ-2-F-16	0.709425	5.7e-05	TARIM-K2-24	0.7104	4e-05
HZZ-2-F-17	0.709403	6.2e-05	TARIM-K2-25	0.71038	5e-05
HZZ-2-F-18	0.709409	5.2e-05	TARIM-K2-26	0.71043	4e-05
HZZ-2-F-19	0.709439	5.8e-05	TARIM-K2-27	0.71039	5e-05
HZZ-2-F-20	0.709434	5.6e-05	TARIM-K2-28	0.71042	5e-05
HZZ-2-F-21	0.709403	6.1e-05	TARIM-K2-29	0.71039	4e-05
HZZ-2-F-22	0.709358	5e-05	TARIM-K2-30	0.71045	5e-05
HZZ-2-F-23	0.709376	5.2e-05	TARIM-K2-31	0.71049	4e-05
HZZ-2-F-24	0.709387	5.8e-05	TARIM-K2-32	0.71043	4e-05
HZZ-2-F-25	0.709376	5.4e-05	TARIM-K2-33	0.7104	4e-05
HZZ-2-F-26	0.709407	5.6e-05	TARIM-K2-34	0.71042	4e-05
HZZ-2-F-27	0.709357	5.8e-05	TARIM-K2-35	0.71043	5e-05
HZZ-2-F-28	0.709355	5.6e-05	TARIM-K2-36	0.71037	4e-05
HZZ-2-F-29	0.709363	5.3e-05	TARIM-K2-37	0.7104	4e-05
HZZ-2-F-30	0.709392	5.3e-05	TARIM-K2-38	0.71043	4e-05
HZZ-2-F-31	0.709356	5.4e-05	TARIM-K2-39	0.71043	4e-05
HZZ-2-F-32	0.709366	6.6e-05	TARIM-K2-40	0.7104	4e-05
HZZ-2-F-33	0.709431	5.5e-05	Mean	0.710412	5.27962e-05
HZZ-2-F-34	0.709404	5.4e-05
HZZ-2-F-35	0.709374	5.6e-05	TARIM-L2 @130 μm, 5 J·cm-2, 6 Hz
HZZ-2-F-36	0.709366	5.1e-05	TARIM-L2-01	0.710475	5.4e-05
HZZ-2-F-37	0.709393	4.8e-05	TARIM-L2-02	0.710515	4.9e-05
HZZ-2-F-38	0.709399	5.9e-05	TARIM-L2-03	0.710438	4.4e-05
HZZ-2-F-39	0.709391	5.9e-05	TARIM-L2-04	0.710464	5.1e-05
HZZ-2-F-40	0.709386	5.5e-05	TARIM-L2-05	0.710445	4.7e-05
Mean	0.709391	5.63627e-05	TARIM-L2-06	0.71046	5e-05
			TARIM-L2-07	0.710476	4.4e-05
HZZ-2-G @75 μm, 5 J·cm-2, 6 Hz			TARIM-L2-08	0.710442	5.1e-05
HZZ-2-G-01	0.709405	5.4e-05	TARIM-L2-09	0.710513	4.7e-05
HZZ-2-G-02	0.709431	5.9e-05	TARIM-L2-10	0.71048	4.3e-05
HZZ-2-G-03	0.709418	5.8e-05	TARIM-L2-11	0.710509	5.4e-05
HZZ-2-G-04	0.709467	5.8e-05	TARIM-L2-12	0.710426	4.2e-05
HZZ-2-G-05	0.709441	4.8e-05	TARIM-L2-13	0.710467	4.4e-05
HZZ-2-G-06	0.709423	5.3e-05	TARIM-L2-14	0.710429	4.7e-05
HZZ-2-G-07	0.709409	5.3e-05	TARIM-L2-15	0.710468	3.8e-05
HZZ-2-G-08	0.709441	5e-05	TARIM-L2-16	0.710478	4.2e-05
HZZ-2-G-09	0.709397	5.5e-05	TARIM-L2-17	0.710449	4.4e-05
HZZ-2-G-10	0.709428	5.9e-05	TARIM-L2-18	0.710424	4.8e-05
HZZ-2-G-11	0.709434	5e-05	TARIM-L2-19	0.71044	5.2e-05
HZZ-2-G-12	0.70941	5.6e-05	TARIM-L2-20	0.710466	5e-05
HZZ-2-G-13	0.709414	5.3e-05	TARIM-L2-21	0.710481	4.9e-05
HZZ-2-G-14	0.70943	5.1e-05	TARIM-L2-22	0.710445	4.3e-05
HZZ-2-G-15	0.70939	5.1e-05	TARIM-L2-23	0.710416	4.9e-05
HZZ-2-G-16	0.709451	5e-05	TARIM-L2-24	0.710475	4.2e-05
HZZ-2-G-17	0.709366	4.8e-05	TARIM-L2-25	0.710446	3.9e-05
HZZ-2-G-18	0.709426	5.5e-05	TARIM-L2-26	0.710475	4.1e-05
HZZ-2-G-19	0.709432	4.6e-05	TARIM-L2-27	0.710486	4.6e-05
HZZ-2-G-20	0.709447	4.6e-05	TARIM-L2-28	0.710462	4.3e-05
HZZ-2-G-21	0.70945	5.5e-05	TARIM-L2-29	0.710455	4.4e-05
HZZ-2-G-22	0.709411	5.3e-05	TARIM-L2-30	0.710485	4.2e-05
HZZ-2-G-23	0.709399	4.7e-05	TARIM-L2-31	0.710437	4.6e-05
HZZ-2-G-24	0.709443	5e-05	TARIM-L2-32	0.710475	4.6e-05
HZZ-2-G-25	0.709428	7.5e-05	TARIM-L2-33	0.710455	4e-05
HZZ-2-G-26	0.709371	5.4e-05	TARIM-L2-34	0.71045	4.3e-05
HZZ-2-G-27	0.709406	5e-05	TARIM-L2-35	0.710456	4.1e-05
HZZ-2-G-28	0.709371	5.3e-05	TARIM-L2-36	0.710493	4.5e-05
HZZ-2-G-29	0.709404	5.1e-05	TARIM-L2-37	0.710454	4.2e-05
HZZ-2-G-30	0.70943	4.5e-05	TARIM-L2-38	0.710483	4.3e-05
HZZ-2-G-31	0.709395	5.3e-05	TARIM-L2-39	0.710517	4.5e-05
HZZ-2-G-32	0.709438	5.2e-05	TARIM-L2-40	0.710484	4.6e-05
HZZ-2-G-33	0.709385	4.9e-05	Mean	0.710465	5.0213e-05
HZZ-2-G-34	0.709386	5.2e-05
HZZ-2-G-35	0.70949	0.0001	TARIM-M2 @130 μm, 5 J·cm-2, 6 Hz
HZZ-2-G-36	0.709449	8.1e-05	TARIM-M2-01	0.710425	4.8e-05
HZZ-2-G-37	0.709362	5.7e-05	TARIM-M2-02	0.710393	3.8e-05
HZZ-2-G-38	0.709411	5.6e-05	TARIM-M2-03	0.710371	4e-05
HZZ-2-G-39	0.709374	4.9e-05	TARIM-M2-04	0.710373	4.2e-05
HZZ-2-G-40	0.709382	4.9e-05	TARIM-M2-05	0.710426	4e-05
Mean	0.709416	5.82887e-05	TARIM-M2-06	0.710373	4.3e-05
			TARIM-M2-07	0.710386	3.8e-05
HZZ-2-H @75 μm, 5 J·cm-2, 6 Hz			TARIM-M2-08	0.710399	4.4e-05
HZZ-2-H-01	0.70941	4.7e-05	TARIM-M2-09	0.710364	3.8e-05
HZZ-2-H-02	0.70945	4.5e-05	TARIM-M2-10	0.71038	3.9e-05
HZZ-2-H-03	0.709415	4.6e-05	TARIM-M2-11	0.710381	4.3e-05
HZZ-2-H-04	0.709445	4.8e-05	TARIM-M2-12	0.710368	4.6e-05
HZZ-2-H-05	0.709393	4.7e-05	TARIM-M2-13	0.710392	4.7e-05
HZZ-2-H-06	0.709421	4.7e-05	TARIM-M2-14	0.710374	8.6e-05
HZZ-2-H-07	0.709386	4.9e-05	TARIM-M2-15	0.710402	4.6e-05
HZZ-2-H-08	0.709379	4.2e-05	TARIM-M2-16	0.710387	4.3e-05
HZZ-2-H-09	0.70934	4.5e-05	TARIM-M2-17	0.710348	4.4e-05
HZZ-2-H-10	0.709341	5.5e-05	TARIM-M2-18	0.710345	4.8e-05
HZZ-2-H-11	0.70943	5.2e-05	TARIM-M2-19	0.7104	4.6e-05
HZZ-2-H-12	0.709392	4.2e-05	TARIM-M2-20	0.710401	4.8e-05
HZZ-2-H-13	0.709367	5.1e-05	TARIM-M2-21	0.710335	6.2e-05
HZZ-2-H-14	0.709365	5.2e-05	TARIM-M2-22	0.710352	4.5e-05
HZZ-2-H-15	0.709409	4.9e-05	TARIM-M2-23	0.710382	5.8e-05
HZZ-2-H-16	0.709437	5.8e-05	TARIM-M2-24	0.710336	5.2e-05
HZZ-2-H-17	0.709454	4.6e-05	TARIM-M2-25	0.710347	4.6e-05
HZZ-2-H-18	0.709388	5.5e-05	TARIM-M2-26	0.710397	4.4e-05
HZZ-2-H-19	0.709449	5.1e-05	TARIM-M2-27	0.710375	4.9e-05
HZZ-2-H-20	0.709371	5.5e-05	TARIM-M2-28	0.710381	4.9e-05
HZZ-2-H-21	0.709378	4.3e-05	TARIM-M2-29	0.710385	4.4e-05
HZZ-2-H-22	0.709456	4.8e-05	TARIM-M2-30	0.710373	3.7e-05
HZZ-2-H-23	0.709368	5.4e-05	TARIM-M2-31	0.710412	4.8e-05
HZZ-2-H-24	0.709363	5.1e-05	TARIM-M2-32	0.710405	4.1e-05
HZZ-2-H-25	0.709412	4.5e-05	TARIM-M2-33	0.710386	4e-05
HZZ-2-H-26	0.709379	4.9e-05	TARIM-M2-34	0.710397	4.4e-05
HZZ-2-H-27	0.709384	5.2e-05	TARIM-M2-35	0.710434	5.1e-05
HZZ-2-H-28	0.709429	5e-05	Mean	0.710382	4.85078e-05
HZZ-2-H-29	0.70944	4.5e-05
HZZ-2-H-30	0.709405	5.6e-05	MNP @23 μm, 5 J·cm-2, 6 Hz
HZZ-2-H-31	0.709431	5.8e-05	MNP-J-01	0.706053	8.4e-05
HZZ-2-H-32	0.709462	6e-05	MNP-J-02	0.706036	8.9e-05
HZZ-2-H-33	0.709416	4.9e-05	MNP-J-03	0.706071	7.7e-05
HZZ-2-H-34	0.709401	5.2e-05	MNP-J-04	0.706101	9.1e-05
HZZ-2-H-35	0.709412	5.5e-05	MNP-J-05	0.706147	8.7e-05
HZZ-2-H-36	0.709371	5e-05	MNP-K-01	0.70607	9e-05
HZZ-2-H-37	0.709357	5.1e-05	MNP-K-02	0.70607	0.00025
HZZ-2-H-38	0.709478	6.2e-05	MNP-K-03	0.70591	0.00024
HZZ-2-H-39	0.709423	5e-05	MNP-K-04	0.70612	9e-05
HZZ-2-H-40	0.709414	5.2e-05	MNP-K-05	0.706	0.0001
Mean	0.709406	6.93501e-05	MNP-L-01	0.706071	8.3e-05
			MNP-L-02	0.706079	7.7e-05
MNP @23 μm, 5 J·cm-2, 6 Hz			MNP-L-03	0.706076	8e-05
MNP-01	0.70591	0.00018	MNP-L-04	0.70617	8.4e-05
MNP-02	0.70592	0.0002	MNP-L-05	0.70605	9.1e-05
MNP-03	0.70588	0.00017	MNP-M-01	0.706106	8.6e-05
MNP-04	0.70592	0.00018	MNP-M-02	0.706037	9e-05
MNP-05	0.70595	0.00015	MNP-M-03	0.706191	7.6e-05
Mean	0.705916	5.01996e-05	MNP-M-04	0.706082	9.3e-05
MNP-01	0.70603	0.00014	Mean	0.706076	0.000123277
MNP-02	0.70606	0.00019
MNP-03	0.70609	0.00018
MNP-04	0.70606	0.00018
MNP-05	0.706	0.00014
Mean	0.706048	6.84105e-05
MNP-01	0.70602	0.00015
MNP-02	0.70601	0.00013
MNP-03	0.70594	0.00016
MNP-04	0.70599	0.00015
MNP-05	0.70607	0.00014
Mean	0.706006	9.44458e-05
MNP-01	0.70612	0.00035
MNP-02	0.70614	0.00016
MNP-03	0.70613	0.00021
MNP-04	0.70607	0.00015
Mean	0.706115	6.21825e-05
MNP-01	0.70589	0.00024
MNP-02	0.70607	0.00026
MNP-03	0.70605	0.00017
MNP-04	0.70606	0.00017
MNP-05	0.70607	0.00047
Mean	0.706028	0.000155177
MNP @33 μm, 5 J·cm-2, 6 Hz
MNP-01	0.706068	4e-05
MNP-02	0.70611	7.5e-05
MNP-03	0.706062	4.2e-05
MNP-04	0.706047	3.6e-05
MNP-05	0.706046	4.4e-05
MNP-06	0.706103	4.2e-05
MNP-07	0.706049	3.8e-05
MNP-08	0.706057	6.1e-05
MNP-09	0.706071	5.6e-05
MNP-10	0.705975	8.9e-05
MNP-11	0.706047	8e-05
MNP-12	0.706159	6e-05
MNP-13	0.706125	4.3e-05
MNP-14	0.706118	4.5e-05
Mean	0.706074	9.12223e-05
LSJ07 @110 μm, 5 J·cm-2, 6 Hz
LSJ07-01	0.71012	0.00017
LSJ07-02	0.7102	0.00012
LSJ07-03	0.71017	0.00019
LSJ07-04	0.71016	0.00014
LSJ07-05	0.71011	0.00018
Mean	0.710152	7.4027e-05
LSJ07-01	0.710184	9.9e-05
LSJ07-02	0.71021	0.0001
LSJ07-03	0.71012	8.3e-05
LSJ07-04	0.710164	8.7e-05
LSJ07-05	0.710193	8.3e-05
Mean	0.710174	6.90855e-05
LSJ07-01	0.71023	0.00013
LSJ07-02	0.71014	0.00011
LSJ07-03	0.710134	9.6e-05
LSJ07-04	0.71021	0.00011
LSJ07-05	0.71021	0.00011
Mean	0.710185	8.88864e-05
LSJ07-01	0.71011	0.00011
LSJ07-02	0.71016	0.0001
LSJ07-03	0.71028	0.00013
LSJ07-04	0.71012	0.00011
LSJ07-05	0.71015	0.00013
Mean	0.710164	0.000136088
LSJ07 @160 μm, 5 J·cm-2, 6 Hz
LSJ07-01	0.710183	4.7e-05
LSJ07-02	0.710104	4e-05
LSJ07-03	0.710139	3.6e-05
LSJ07-04	0.710147	3.6e-05
LSJ07-05	0.710129	3.8e-05
LSJ07-06	0.710124	4.8e-05
LSJ07-07	0.710122	4e-05
LSJ07-08	0.71012	3.5e-05
LSJ07-09	0.71013	4.5e-05
LSJ07-10	0.710108	4.8e-05
LSJ07-11	0.710117	4.1e-05
LSJ07-12	0.7101	4.5e-05
LSJ07-13	0.7101	4.2e-05
LSJ07-14	0.710094	3.7e-05
Mean	0.710123	4.65658e-05
